# Supplementary material for: Probing the methanol-assisted autocatalytic formation of methanol over Cu/ZnO/Al2O3 by high-pressure methanol and methyl formate pulses
Source: Royal Society of Chemistry journal article supplement (doi:10.1039/d2re00185c), 2022-01-01
Supplement: d2re00185c1.pdf [file d2re00185c1.pdf]

## Supporting information

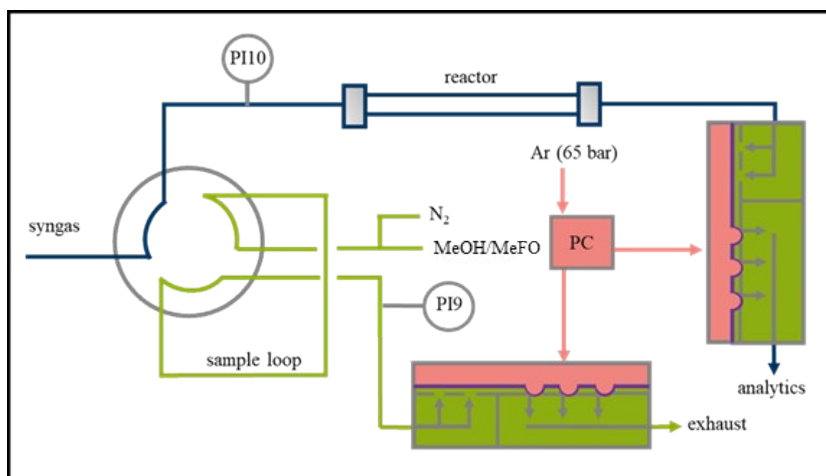

**Fig. S1.** Schematic drawing of the high-pressure pulse unit (HPPU) containing a 6 port, a 2 position dosing valve equipped with a 1 mL sample loop and two identical back pressure regulators (BPR) connected to a process pressure controller.

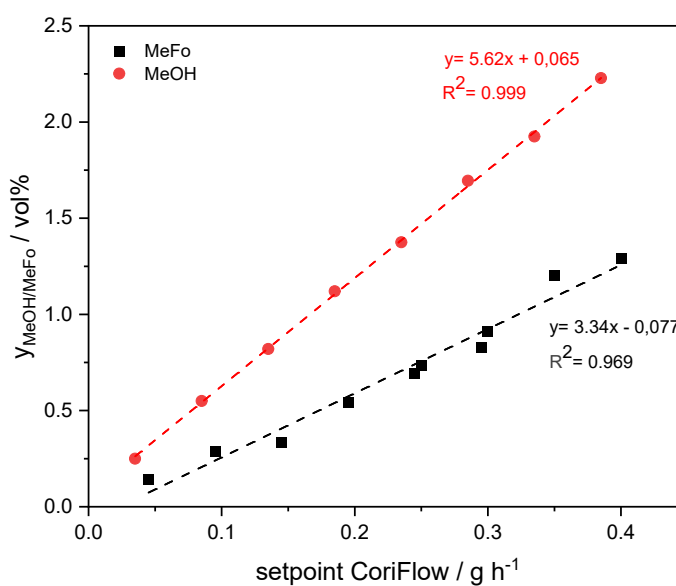

**Fig. S2.** Calibration of methyl formate and methanol for the high-pressure evaporator system. The evaporator temperature was set to 165°C and the diluting N<sub>2</sub> gas flow was 200 Nml min<sup>-1</sup>.

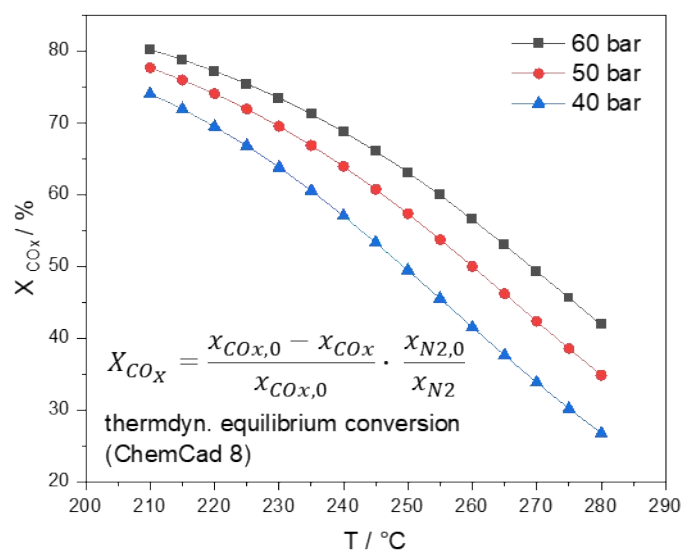

**Fig. S3.** Thermodynamic equilibrium conversion for methanol synthesis from CO/CO<sub>2</sub>/H<sub>2</sub>/N<sub>2</sub> (13.5 vol%/ 3.5 vol%/ 73.5 vol%/ 9.5 vol%) synthesis gas at 210°C and 60 bar 40, 50 and 60 bar depending on temperature. All calculations were performed using ChemCad 8.

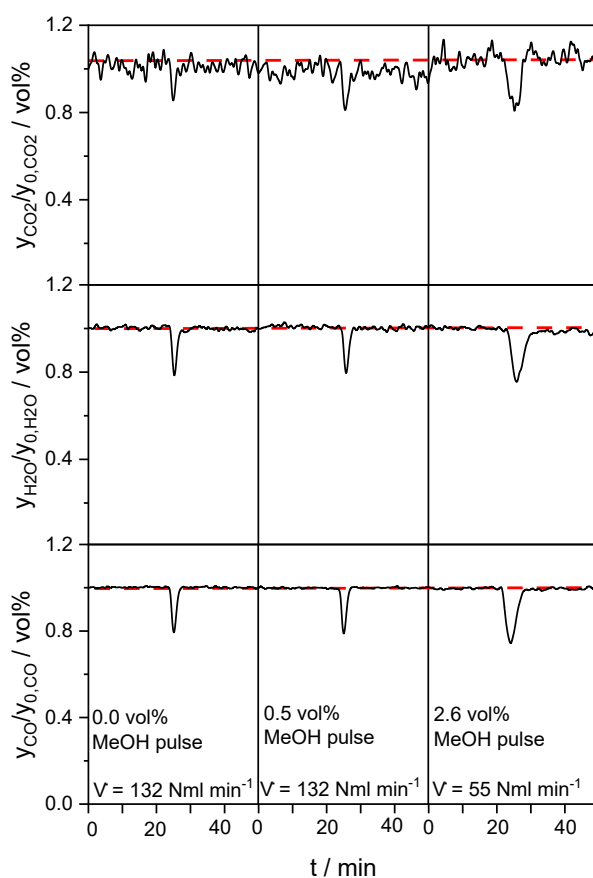

**Fig. S4.** Recorded mole fractions of CO, CO<sub>2</sub> and H<sub>2</sub>O normalized to the initial mole fraction before pulses during the methanol pulse series. Methanol synthesis was performed from CO/CO<sub>2</sub>/H<sub>2</sub>/N<sub>2</sub> (13.5 vol%/ 3.5 vol%/ 73.5 vol%/ 9.5 vol%) synthesis gas at 210°C and 60 bar. The mole fractions of the dosed methanol pulses and the respective gas flow rates are shown below the pulses.

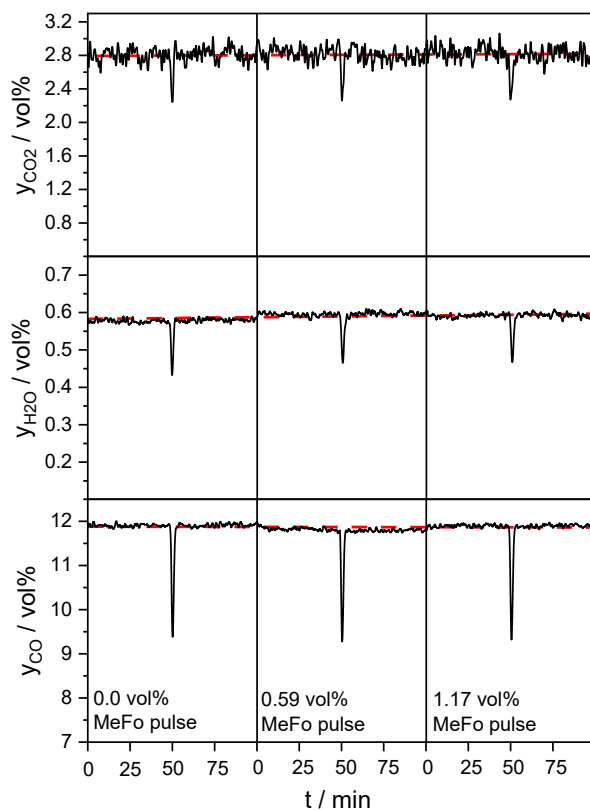

**Fig. S5.** Recorded mole fractions of CO, CO<sub>2</sub> and H<sub>2</sub>O during the methyl formate pulse series. Methanol synthesis was performed from CO/CO<sub>2</sub>/H<sub>2</sub>/N<sub>2</sub> (13.5 vol%/ 3.5 vol%/ 73.5 vol%/ 9.5 vol%) synthesis gas at 210°C and 60 bar. The mole fractions of the dosed methyl formate pulses are shown below the pulses.

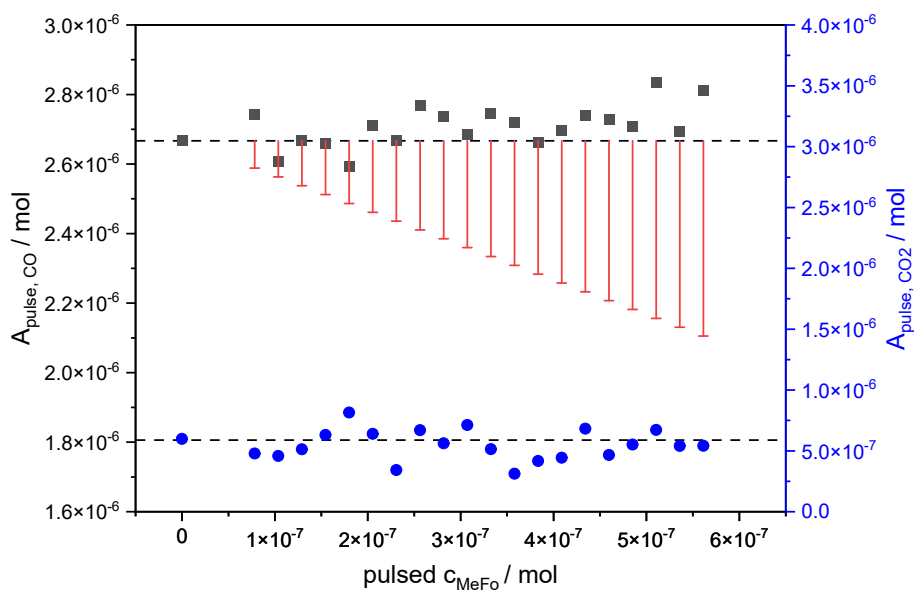

**Fig. S6.** Molar amounts of CO (black squares) and CO<sub>2</sub> (blue dots) detected as responses to methyl formate pulses and the missing molar amount of CO per pulse in red.

**Table S1.** Partial pressures of methanol in the 1 ml sample loop at 60 bar.

| pulsed $n_{\text{MeOH}}$ /<br>mol | pulsed $n_{\text{N}_2}$ /<br>mol | pulsed $n_{\text{MeOH}+\text{N}_2}$ /<br>mol | $p_{\text{MeOH}}$ /<br>bar |
|-----------------------------------|----------------------------------|----------------------------------------------|----------------------------|
| 3.66E-07                          | 3.01E-05                         | 5.92E-03                                     | 0.72                       |
| 4.09E-07                          | 3.01E-05                         | 5.92E-03                                     | 0.80                       |
| 4.61E-07                          | 3.00E-05                         | 5.92E-03                                     | 0.91                       |
| 5.14E-07                          | 3.00E-05                         | 5.92E-03                                     | 1.01                       |
| 5.92E-07                          | 3.00E-05                         | 5.92E-03                                     | 1.16                       |
| 5.77E-07                          | 2.99E-05                         | 5.92E-03                                     | 1.13                       |
| 6.19E-07                          | 2.99E-05                         | 5.92E-03                                     | 1.22                       |
| 6.63E-07                          | 2.98E-05                         | 5.92E-03                                     | 1.30                       |
| 7.05E-07                          | 2.98E-05                         | 5.92E-03                                     | 1.39                       |
| 7.48E-07                          | 2.97E-05                         | 5.92E-03                                     | 1.47                       |
| 7.91E-07                          | 2.97E-05                         | 5.92E-03                                     | 1.56                       |
